# Supplementary material
Source: Springer Nature journal article supplement (https://www.springermedizin.de/resource/supplementary/12936_2011_2043_MOESM2_ESM.pdf/9543398)

A) DBP

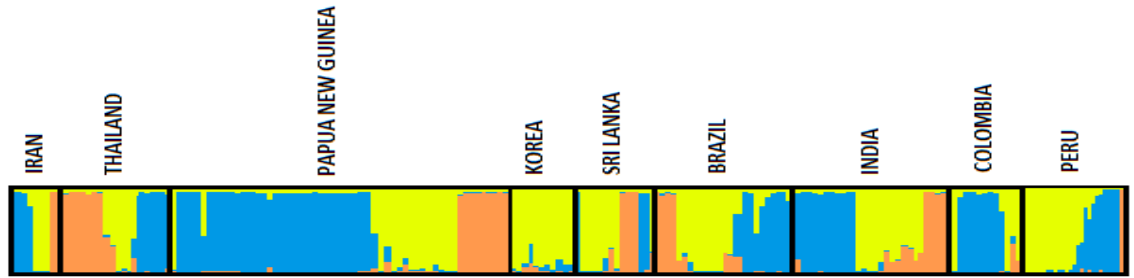

B) AMA-1

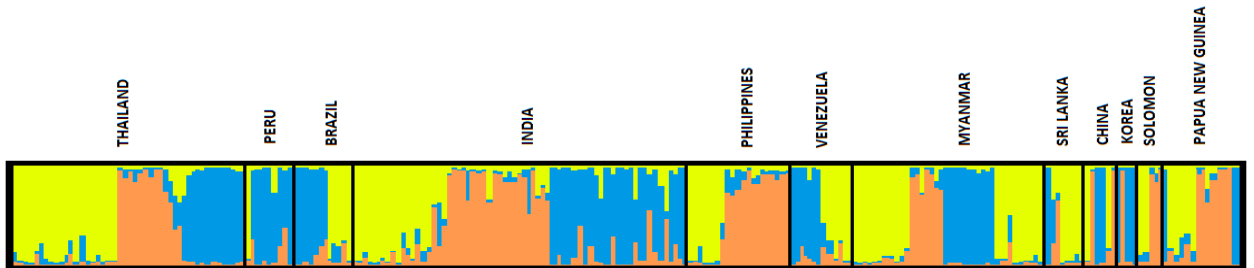

C) TRAP

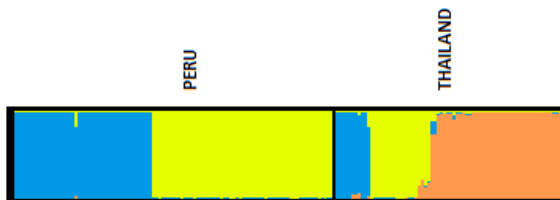

Supplement: MOESM2 [file 9543398]
